# Supplementary material for: Characterization of Potato Virus Y Isolates and Assessment of Nanopore Sequencing to Detect and Genotype Potato Viruses
Source: MDPI journal article supplement (doi:10.3390/v12040478), 2020-04-23
Supplement: s1 [file s1]

**Table S.1** List of plant samples included in the study. Sampling date, geographical origin and results of the molecular and serological tests are reported.

| Sample ID | Sampling date | Origin     | Virus detected | RT-PCR<br>PVY genotype         | ELISA<br>PVY Pab | ELISA<br>PVY Mab |
|-----------|---------------|------------|----------------|--------------------------------|------------------|------------------|
| P001      | 26/06/2017    | Co. Carlow | PVY            | NWi                            | +                | O/C              |
| P002      | 26/06/2017    | Co. Carlow | -              |                                | -                | -                |
| P003      | 26/06/2017    | Co. Carlow | PVY            | NTNa                           | +                | N                |
| P004      | 26/06/2017    | Co. Carlow | PVY            | NTNa                           | +                | N                |
| P005      | 26/06/2017    | Co. Carlow | PVY            | NWi                            | +                | O/C              |
| P006      | 26/06/2017    | Co. Carlow | PVY            | NTNa                           | +                | N                |
| P007      | 26/06/2017    | Co. Carlow | -              | -                              | -                | -                |
| P008      | 26/06/2017    | Co. Carlow | -              | -                              | -                | -                |
| P009      | 26/06/2017    | Co. Carlow | PVY            | NWi                            | +                | O/C              |
| P010      | 26/06/2017    | Co. Carlow | PVY            | NWi                            | +                | O/C              |
| P011      | 26/06/2017    | Co. Carlow | -              | -                              | -                | -                |
| P012      | 26/06/2017    | Co. Carlow | -              | -                              | -                | -                |
| P013      | 26/06/2017    | Co. Carlow | PVY            | NWi                            | +                | O/C              |
| P014      | 26/06/2017    | Co. Carlow | PVY            | NWi                            | +                | O/C              |
| P015      | 26/06/2017    | Co. Carlow | PVY            | NTNa                           | +                | N                |
| P016      | 26/06/2017    | Co. Carlow | -              | -                              | -                | -                |
| P017      | 26/06/2017    | Co. Carlow | -              | -                              | -                | -                |
| P018      | 26/06/2017    | Co. Carlow | PVY            | NTNa                           | +                | N                |
| P019      | 26/06/2017    | Co. Carlow | PVY            | NTNa                           | +                | N                |
| P020      | 26/06/2017    | Co. Carlow | -              | -                              | -                | -                |
| P021      | 26/06/2017    | Co. Carlow | PVY            | NTNa                           | +                | N                |
| P022      | 26/06/2017    | Co. Carlow | PVY            | -                              | -                | -                |
| P023      | 26/06/2017    | Co. Carlow | -              | NWi                            | +                | O/C              |
| P024      | 26/06/2017    | Co. Carlow | PVY            | NWi                            | +                | O/C              |
| P025      | 26/06/2017    | Co. Carlow | PVY            | NTNa                           | +                | N                |
| P026      | 26/06/2017    | Co. Carlow | PVY            | O                              | +                | O/C              |
| P027      | 26/06/2017    | Co. Carlow | PVY            | O + NWi                        | +                | O/C              |
| P028      | 26/06/2017    | Co. Carlow | -              | NWi                            | -                | O/C              |
| P029      | 05/07/2017    | Co. Carlow | PVY            | NTNa                           | +                | N                |
| P030      | 05/07/2017    | Co. Carlow | PVY            | NTNa                           | +                | N                |
| P031      | 05/07/2017    | Co. Carlow | PVY            | Recombinant<br>mixed infection | +                | O/C + N          |
| P032      | 05/07/2017    | Co. Carlow | PVY            | NTNa                           | +                | N                |
| P033      | 05/07/2017    | Co. Carlow | PVY            | Nwi                            | +                | O/C              |
| P034      | 05/07/2017    | Co. Carlow | PVY            | Recombinant<br>mixed infection | +                | O/C + N          |
| P035      | 05/07/2017    | Co. Carlow | PVY            | NWi                            | +                | O/C              |
| P036      | 05/07/2017    | Co. Carlow | PVY            | NWi                            | +                | O/C              |
| P037      | 05/07/2017    | Co. Carlow | PVY            | NWi                            | +                | O/C              |
| P038      | 05/07/2017    | Co. Carlow | -              | -                              | -                | -                |
| P039      | 05/07/2017    | Co. Carlow | PVY            | NWi                            | +                | O/C              |
| P040      | 05/07/2017    | Co. Carlow | PVY            | NWi                            | +                | O/C              |
| P041      | 04/08/2017    | Co. Carlow | -              | -                              | -                | -                |
| P042      | 04/08/2017    | Co. Carlow | PVY            | NTNa                           | +                | N                |
| P043      | 04/08/2017    | Co. Carlow | PVY            | Recombinant<br>mixed infection | +                | O/C + N          |
| P044      | 04/08/2017    | Co. Carlow | PVY            | Recombinant<br>mixed infection | +                | O/C + N          |
| P045      | 04/08/2017    | Co. Carlow | PVY            | NTNa                           | +                | N                |
| P046      | 04/08/2017    | Co. Carlow | PVY            | NTNa                           | +                | N                |
| P047      | 04/08/2017    | Co. Carlow | PVY            | NTNa                           | +                | N                |

| Sample ID | Sampling date | Origin       | Virus detected  | RT-PCR<br>PVY genotype         | ELISA<br>PVY Pab | ELISA<br>PVY Mab |
|-----------|---------------|--------------|-----------------|--------------------------------|------------------|------------------|
| P048      | 04/08/2017    | Co. Carlow   | PVY             | NTNa                           | +                | N                |
| P049      | 04/08/2017    | Co. Carlow   | PVY             | NWi                            | +                | O/C              |
| P050      | 04/08/2017    | Co. Carlow   | PVY             | NWi                            | +                | O/C              |
| P051      | 17/08/2017    | Co. Carlow   | PVY + PVX       | Recombinant<br>mixed infection | +                | O/C + N          |
| P052      | 17/08/2017    | Co. Carlow   | PVY + PVS + PVX | O                              | +                | O/C              |
| P053      | 17/08/2017    | Co. Carlow   | PVY + PVS + PVX | O                              | +                | O/C              |
| P054      | 17/08/2017    | Co. Carlow   | PVY + PVS + PVX | NTNa + O                       | +                | O/C + N          |
| P055      | 17/08/2017    | Co. Carlow   | PVY + PVS + PVX | O                              | +                | O/C              |
| P056      | 17/08/2017    | Co. Carlow   | PVY + PVS       | NWi                            | +                | O/C              |
| P057      | 17/08/2017    | Co. Carlow   | PVY + PVX       | NWi                            | +                | O/C              |
| P058      | 17/08/2017    | Co. Carlow   | PVS + PVX       | -                              | -                | -                |
| P059      | 17/08/2017    | Co. Carlow   | PVY + PVS + PVX | O                              | +                | O/C              |
| P060      | 17/08/2017    | Co. Carlow   | PVY + PVS + PVX | NTNa                           | +                | N                |
| P061      | 17/08/2017    | Co. Carlow   | PVY + PVS + PVA | Recombinant<br>mixed infection | +                | O/C + N          |
| P062      | 17/08/2017    | Co. Carlow   | PVY + PVS       | NTNa + O                       | +                | O/C + N          |
| P063      | 17/08/2017    | Co. Carlow   | PVY + PVS       | O + NWi                        | +                | O/C              |
| P064      | 17/08/2017    | Co. Carlow   | PVY             | NTNa                           | +                | N                |
| P065      | 17/08/2017    | Co. Carlow   | PVY + PVS       | NTNa                           | +                | N                |
| P066      | 17/08/2017    | Co. Carlow   | -               | -                              | -                | -                |
| P067      | 17/08/2017    | Co. Carlow   | PVY + PVS + PVX | NTNa + O                       | +                | O/C + N          |
| P068      | 17/08/2017    | Co. Carlow   | PVY             | NWi                            | +                | O/C              |
| P069      | 17/08/2017    | Co. Carlow   | PVY + PVS + PVX | NWi                            | +                | O/C              |
| P070      | 17/08/2017    | Co. Carlow   | PVY             | NWi                            | +                | O/C              |
| P071      | 18/08/2017    | Co. Kilkenny | PVY             | NTNa                           | +                | N                |
| P073      | 18/08/2017    | Co. Kilkenny | -               | -                              | -                | -                |
| P074      | 18/08/2017    | Co. Kilkenny | -               | -                              | -                | -                |
| P075      | 18/08/2017    | Co. Kilkenny | PVY             | NWi                            | +                | O/C              |
| P076      | 18/08/2017    | Co. Kilkenny | PVY             | NTNa                           | +                | N                |
| P077      | 18/08/2017    | Co. Kilkenny | PVY             | NWi                            | +                | O/C              |
| P079      | 18/08/2017    | Co. Kilkenny | PVY             | NWi                            | +                | O/C              |
| P080      | 18/08/2017    | Co. Kilkenny | PVY             | NTNa                           | +                | N                |
| P082      | 18/08/2017    | Co. Kilkenny | PVY             | NWi                            | +                | O/C              |
| P083      | 18/08/2017    | Co. Kilkenny | PVY             | NWi                            | +                | O/C              |
| P084      | 18/08/2017    | Co. Kilkenny | PVY             | Recombinant<br>mixed infection | +                | O/C + N          |
| P085      | 18/08/2017    | Co. Kilkenny | PVY             | Recombinant<br>mixed infection | +                | O/C + N          |
| P086      | 18/08/2017    | Co. Kilkenny | PVY             | Recombinant<br>mixed infection | +                | O/C + N          |
| P087      | 18/08/2017    | Co. Kilkenny | PVY             | Recombinant<br>mixed infection | +                | O/C + N          |
| P088      | 18/08/2017    | Co. Kilkenny | -               | -                              | -                | -                |
| P089      | 18/08/2017    | Co. Kilkenny | PVY             | NWi                            | +                | O/C              |
| P090      | 18/08/2017    | Co. Kilkenny | PVY             | NTNa                           | +                | N                |
| P091      | 18/08/2017    | Co. Kilkenny | PVY             | NTNa                           | +                | N                |
| P092      | 18/08/2017    | Co. Kilkenny | PVY             | NWi                            | +                | O/C              |
| P093      | 18/08/2017    | Co. Kilkenny | PVY             | NTNa                           | +                | N                |
| P094      | 18/08/2017    | Co. Kilkenny | -               | -                              | -                | -                |
| P095      | 11/09/2017    | Co. Carlow   | -               | -                              | -                | -                |
| P096      | 11/09/2017    | Co. Carlow   | -               | -                              | -                | -                |
| P097      | 11/09/2017    | Co. Carlow   | PVY             | NTNa                           | +                | N                |
| P098      | 11/09/2017    | Co. Carlow   | PVY             | Recombinant<br>mixed infection | +                | O/C + N          |

| Sample ID | Sampling date | Origin      | Virus detected | RT-PCR<br>PVY genotype | ELISA<br>PVY Pab | ELISA<br>PVY Mab |
|-----------|---------------|-------------|----------------|------------------------|------------------|------------------|
| P099      | 11/09/2017    | Co. Carlow  | PVY            | NWi                    | +                | O/C              |
| P100      | 11/09/2017    | Co. Carlow  | PVY            | NTNa + O               | +                | O/C + N          |
| P105      | 11/07/2018    | Co. Louth   | PVY            | NTNa                   | +                | N                |
| P106      | 11/07/2018    | Co. Louth   | PVY            | NTNa                   | +                | N                |
| P107      | 04/07/2018    | Co. Louth   | PVY            | NTNa                   | +                | N                |
| P108      | 04/07/2018    | Co. Louth   | PVY            | NTNa                   | +                | N                |
| P109      | 05/07/2018    | Co. Louth   | PVY            | NTNa                   | +                | N                |
| P110      | 05/07/2018    | Co. Louth   | PVY            | NTNa                   | +                | N                |
| P111      | 05/07/2018    | Co. Louth   | PVY            | NTNa                   | +                | N                |
| P112      | 05/07/2018    | Co. Louth   | PVY            | NTNa                   | +                | N                |
| P113      | 05/07/2018    | Co. Louth   | PVY            | NTNa                   | +                | N                |
| P114      | 05/07/2018    | Co. Louth   | PVY            | NTNa                   | +                | N                |
| P115      | 05/07/2018    | Co. Louth   | PVY            | NTNa                   | +                | N                |
| P116      | 05/07/2018    | Co. Louth   | PVY            | NTNa                   | +                | N                |
| P117      | 11/07/2018    | Co. Cork    | PVY            | NTNa                   | +                | N                |
| P118      | 11/07/2018    | Co. Cork    | -              | -                      | -                | -                |
| P119      | 11/07/2018    | Co. Cork    | PVY            | NTNa                   | +                | N                |
| P120      | 11/07/2018    | Co. Cork    | PVA            | -                      | -                | -                |
| P121      | 11/07/2018    | Co. Cork    | PVA            | -                      | -                | -                |
| P122      | 11/07/2018    | Co. Cork    | PVY            | NTNa                   | +                | N                |
| P123      | 11/07/2018    | Co. Cork    | PVA            | -                      | -                | -                |
| P124      | 11/07/2018    | Co. Cork    | PVA            | -                      | -                | -                |
| P125      | 11/07/2018    | Co. Cork    | PVY            | NTNa                   | +                | N                |
| P126      | 11/07/2018    | Co. Cork    | PVA            | -                      | -                | -                |
| P127      | 13/07/2018    | Co. Louth   | PVY            | NTNa                   | +                | N                |
| P128      | 13/07/2018    | Co. Louth   | PVY            | NTNa                   | +                | N                |
| P129      | 13/07/2018    | Co. Louth   | PVY            | NTNa                   | +                | N                |
| P130      | 13/07/2018    | Co. Louth   | PVY            | NTNa                   | +                | N                |
| P131      | 13/07/2018    | Co. Louth   | PVY            | NTNa                   | +                | N                |
| P132      | 13/07/2018    | Co. Louth   | PVY            | NTNa                   | +                | N                |
| P133      | 13/07/2018    | Co. Louth   | PVY            | NTNa                   | +                | N                |
| P134      | 13/07/2018    | Co. Louth   | PVY            | NTNa                   | +                | N                |
| P135      | 13/07/2018    | Co. Louth   | PVY            | NTNa                   | +                | N                |
| P136      | 13/07/2018    | Co. Louth   | PVY            | NTNa                   | +                | N                |
| P137      | 13/07/2018    | Co. Louth   | PVY            | NTNa                   | +                | N                |
| P138      | 13/07/2018    | Co. Louth   | PVY            | NTNa                   | +                | N                |
| P139      | 13/07/2018    | Co. Louth   | PVY            | NTNa                   | +                | N                |
| P140      | 13/07/2018    | Co. Louth   | PVY            | NTNa                   | +                | N                |
| P141      | 16/07/2018    | Co. Donegal | PVY            | NA-N                   | +                | N                |
| P142      | 16/07/2018    | Co. Donegal | PVY            | NTNa                   | +                | N                |
| P143      | 16/07/2018    | Co. Donegal | PVY            | NTNa                   | +                | N                |
| P144      | 18/07/2018    | Co. Donegal | PVY            | NTNa                   | +                | N                |
| P145      | 18/07/2018    | Co. Donegal | PVY            | NTNa                   | +                | N                |
| P146      | 18/07/2018    | Co. Donegal | PVY            | NTNa                   | +                | N                |
| P147      | 18/07/2018    | Co. Donegal | PVY            | NTNa                   | +                | N                |
| P148      | 18/07/2018    | Co. Donegal | PVY            | NTNa                   | +                | N                |
| P149      | 18/07/2018    | Co. Donegal | PVY            | NTNa                   | +                | N                |
| P150      | 17/07/2018    | Co. Louth   | PVY            | NTNa                   | +                | N                |
| P151      | 17/07/2018    | Co. Louth   | PVY            | NTNa                   | +                | N                |
| P152      | 17/07/2018    | Co. Louth   | -              | -                      | -                | -                |
| P153      | 17/07/2018    | Co. Louth   | PVY            | NTNa                   | +                | N                |
| P154      | 17/07/2018    | Co. Louth   | PVY            | NTNa                   | +                | N                |

| Sample ID | Sampling date | Origin      | Virus detected | RT-PCR<br>PVY genotype         | ELISA<br>PVY Pab | ELISA<br>PVY Mab |
|-----------|---------------|-------------|----------------|--------------------------------|------------------|------------------|
| P155      | 25/07/2018    | Co. Offaly  | PVY            | NA-N                           | +                | N                |
| P156      | 25/07/2018    | Co. Offaly  | PVY            | N                              | +                | N                |
| P157      | 25/07/2018    | Co. Offaly  | PVY            | NTNa                           | +                | N                |
| P158      | 25/07/2018    | Co. Offaly  | PVY            | NA-N                           | +                | N                |
| P159      | 25/07/2018    | Co. Offaly  | PVY            | NTNa                           | +                | N                |
| P160      | 25/07/2018    | Co. Offaly  | -              | -                              | -                | -                |
| P161      | 25/07/2018    | Co. Offaly  | PVY            | NTNa                           | +                | N                |
| P162      | 25/07/2018    | Co. Offaly  | PVY            | NTNa                           | +                | N                |
| P163      | 30/07/2018    | Co. Offaly  | -              | -                              | -                | -                |
| P164      | 30/07/2018    | Co. Offaly  | -              | -                              | -                | -                |
| P165      | 30/07/2018    | Co. Offaly  | -              | -                              | -                | -                |
| P166      | 30/07/2018    | Co. Offaly  | PLRV           | -                              | -                | -                |
| P167      | 30/07/2018    | Co. Offaly  | -              | -                              | -                | -                |
| P168      | 30/07/2018    | Co. Offaly  | -              | -                              | -                | -                |
| P169      | 30/07/2018    | Co. Offaly  | -              | -                              | -                | -                |
| P170      | 30/07/2018    | Co. Offaly  | -              | -                              | -                | -                |
| P187      | 31/07/2018    | Co. Wexford | PVY + PVA      | NTNa                           | +                | N                |
| P188      | 31/07/2018    | Co. Wexford | PVY + PVA      | NTNa                           | +                | N                |
| P189      | 31/07/2018    | Co. Wexford | PVY + PVA      | NTNa                           | +                | N                |
| P190      | 31/07/2018    | Co. Wexford | PVY + PVA      | NTNa + O                       | +                | O/C + N          |
| P191      | 31/07/2018    | Co. Wexford | PVY + PVA      | NTNa + O                       | +                | O/C + N          |
| P192      | 31/07/2018    | Co. Wexford | PVY            | NTNa                           | +                | N                |
| P193      | 31/07/2018    | Co. Wexford | PVY            | NTNa                           | +                | N                |
| P194      | 31/07/2018    | Co. Wexford | PVY            | NTNa                           | +                | N                |
| P195      | 27/07/2018    | Co. Louth   | PVY            | NTNa                           | +                | N                |
| P196      | 27/07/2018    | Co. Louth   | PVY            | NTNa                           | +                | N                |
| P197      | 27/07/2018    | Co. Louth   | PVY            | NTNa                           | +                | N                |
| P198      | 27/07/2018    | Co. Louth   | PVY            | NTNa                           | +                | N                |
| P199      | 02/08/2018    | Co. Offaly  | PVY            | NTNa                           | +                | N                |
| P200      | 02/08/2018    | Co. Offaly  | PVY            | NA-N                           | +                | N                |
| P201      | 02/08/2018    | Co. Offaly  | PVY            | NTNa                           | +                | N                |
| P202      | 02/08/2018    | Co. Offaly  | PVY            | NA-N                           | +                | N                |
| P203      | 02/08/2018    | Co. Offaly  | PVY            | NTNa                           | +                | N                |
| P204      | 02/08/2018    | Co. Offaly  | PVY            | NTNa                           | +                | N                |
| P205      | 02/08/2018    | Co. Offaly  | PVY            | NTNa                           | +                | N                |
| P206      | 02/08/2018    | Co. Offaly  | PVY            | NTNa                           | +                | N                |
| P207      | 02/08/2018    | Co. Offaly  | PVY            | NTNa                           | +                | N                |
| P208      | 02/08/2018    | Co. Offaly  | PVY            | NTNa                           | +                | N                |
| P209      | 02/08/2018    | Co. Offaly  | PVY            | NTNa                           | +                | N                |
| P210      | 02/08/2018    | Co. Offaly  | PVY            | NTNa                           | +                | N                |
| P211      | 08/08/2018    | Co. Carlow  | PVY            | O + NA-N                       | +                | O/C + N          |
| P212      | 08/08/2018    | Co. Carlow  | PVY            | O + Nwi                        | +                | O/C              |
| P213      | 08/08/2018    | Co. Carlow  | PVY            | Nwi                            | +                | O/C              |
| P214      | 08/08/2018    | Co. Carlow  | PVY            | O + Na-N                       | +                | O/C + N          |
| P215      | 12/09/2018    | Co. Carlow  | -              | -                              | -                | -                |
| P217      | 12/09/2018    | Co. Carlow  | PVY + PVS      | Nwi                            | +                | O/C              |
| P218      | 12/09/2018    | Co. Carlow  | -              | -                              | -                | -                |
| P219      | 12/09/2018    | Co. Carlow  | PVY + PVS      | Nwi                            | +                | O/C              |
| P220      | 12/09/2018    | Co. Carlow  | PVY + PVS      | O                              | +                | O/C              |
| P221      | 12/09/2018    | Co. Carlow  | PVY            | Recombinant<br>mixed infection | +                | O/C + N          |
| P222      | 12/09/2018    | Co. Carlow  | PVY            | NTNa                           | +                | N                |

| Sample ID | Sampling date | Origin     | Virus detected | RT-PCR PVY genotype         | ELISA PVY Pab | ELISA PVY Mab |
|-----------|---------------|------------|----------------|-----------------------------|---------------|---------------|
| P223      | 17/09/2018    | Co. Carlow | PVY            | NTNa                        | +             | N             |
| P224      | 17/09/2018    | Co. Carlow | PVY            | Recombinant mixed infection | +             | O/C + N       |

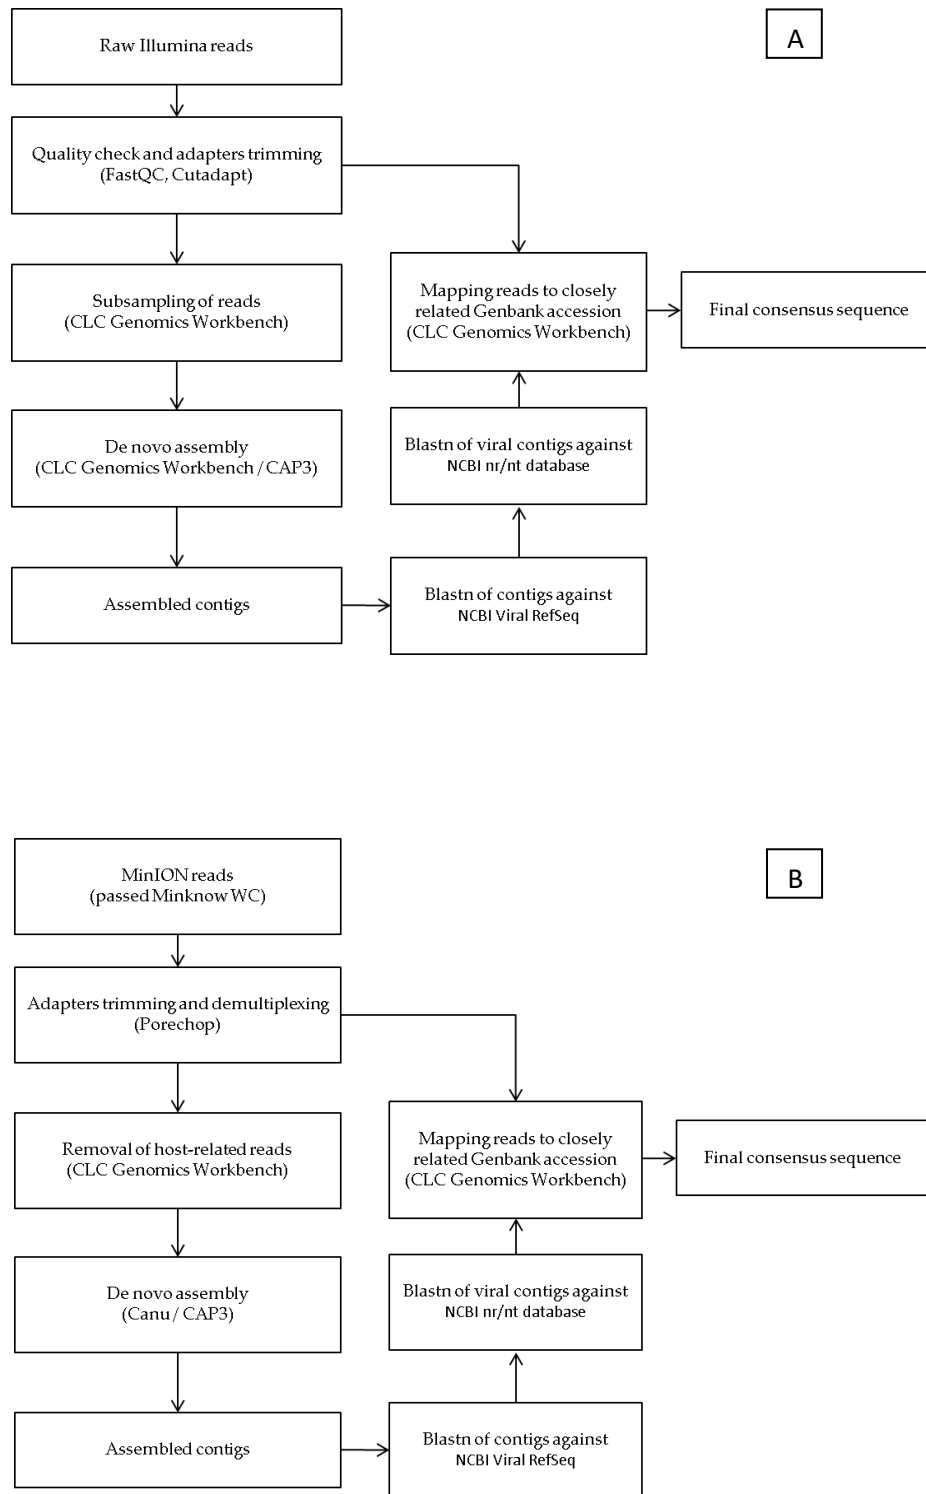

**Figure S.1** Diagram representing the workflow used for analysis of sequencing data (A. Illumina reads; B. MinION reads)

**Table S.2.** Complete list of all PVY complete genomes used in PVY phylogenetic and recombination analyses.

| #  | Isolate Name | GenBank Accession | PVY Strain [14] | Origin      |
|----|--------------|-------------------|-----------------|-------------|
| 1  | PVYOUK       | JX424837          | O               | Finland     |
| 2  | IUNG_15      | JF927763          | NTNa            | Poland      |
| 3  | IUNG_5       | JF927753          | NWi             | Poland      |
| 4  | N_605        | X97895            | Eu-N            | Switzerland |
| 8  | SASA-61      | AJ585198          | Na-N            | UK          |
| 9  | NTNON92      | AB331519          | Na-N            | Japan       |
| 10 | SON41        | AJ439544          | C               | France      |
| 11 | MN           | AF463399          | C               | USA         |
| 12 | SCRI_O       | AJ585196          | O               | UK          |
| 13 | CO284        | HQ912905          | O5              | USA         |
| 14 | DEL3         | KP691325          | O5              | USA         |
| 15 | Mont         | AY884983          | Eu-N            | USA         |
| 16 | SASA-207     | AJ584851          | N:O (long)      | UK          |
| 17 | 34_01        | AJ890342          | NTNb            | Poland      |
| 18 | SYR_NB_16    | AB270705          | SYR I           | Syria       |
| 19 | SYR_II_2_8   | AB461451          | SYR II          | Syria       |
| 20 | HC_2quan     | HM590406          | NTNb            | China       |
| 21 | SYR_III_L4   | AB461454          | SYR III         | Syria       |
| 22 | IUNG_14      | JF927762          | N:O short       | Poland      |
| 23 | ME162_CN     | JQ971975          | NE 11 long      | USA         |
| 24 | Eu_12Jp      | AB702945          | NTNa            | Japan       |
| 25 | VNP415       | HG810951          | SYR II          | Vietnam     |
| 26 | ShX14        | KJ634024          | SYR I           | China       |
| 27 | ID26         | KY847955          | NE 11 short     | USA         |
| 28 | ID26         | KY847996          | NWi             | USA         |
| 29 | Egypt7       | KY863549          | SYR III         | Egypt       |

**Table S.3** Integrity of RNA extracts used for Illumina and ONT's MinION sequencing.

| Plant Sample | RIN Value <sup>1</sup> | rRNA ratio <sup>1</sup> |
|--------------|------------------------|-------------------------|
| P026         | 3.4                    | 0.1                     |
| P097         | 5.0                    | 0.6                     |
| P099         | 5.7                    | 1.0                     |
| P156         | 2.1                    | 0.1                     |
| P141         | 2.1                    | 0.1                     |
| P221         | 3.5                    | 0.4                     |
| P166         | 2.3                    | 0.1                     |
| P059         | 4.8                    | 1.2                     |

<sup>1</sup> as assessed using Agilent RNA 6000 Pico chip on a 2100 Bioanalyzer (Agilent Technologies)



**Table S.4** Additional statistics of MinION sequencing. Number of raw reads per sequencing run, number of reads per sample after trimming/demultiplexing and after removal of host-related reads. The percentage of reads mapping to the viruse(s) detected is also reported, together with the maximum and average length of virus-related reads.

| Sequencing run<br>(No. of raw<br>reads <sup>1</sup> ) | Sample | Library | No. of reads <sup>2</sup> | No. reads after<br>hostfiltering - % | % of reads<br>mapped to virus reference<br>(accession no.) | Maximum / average<br>length of mapped reads |
|-------------------------------------------------------|--------|---------|---------------------------|--------------------------------------|------------------------------------------------------------|---------------------------------------------|
| PolyT Run 1<br>(9463852)                              | P026   | polyT   | 1445021                   | 29296 – 2.03%                        | 0.71% (JX424937)                                           | 6685 / 1007.36 nt                           |
|                                                       | P097   | polyT   | 1567476                   | 51355 – 3.28%                        | 0.54% (JF927763)                                           | 3801 / 572.63 nt                            |
|                                                       | P099   | polyT   | 1676243                   | 65574 – 3.91%                        | 0.98% (JF927753)                                           | 4454 / 586.15 nt                            |
|                                                       | P156   | polyT   | 1346123                   | 76483 – 5.68%                        | 2.84% (X97895)                                             | 6250 / 494.73 nt                            |
| PolyT Run 2<br>(7963207)                              | P141   | polyT   | 936278                    | 48821 – 5.21%                        | 2.74% (AB331517)                                           | 5476 / 568.69 nt                            |
|                                                       | P221   | polyT   | 1005366                   | 58253 – 5.79%                        | 1.08% (JF927763)<br>1.53% (JF927754)                       | 4491 / 458.64 nt<br>5697 / 502.09 nt        |
|                                                       | P166   | polyT   | 668443                    | 26926 – 4.03%                        | 0.24% (AY138970)                                           | 2442 / 318.54 nt                            |
|                                                       | P059   | polyT   | 865252                    | 142641 – 16.49%                      | 1.63% (MF418030)                                           | 3885 / 528.01 nt                            |
|                                                       |        |         |                           |                                      | 11.51% (KR605396)                                          | 4397 / 462.60 nt                            |
|                                                       |        |         |                           |                                      | 0.23% (MH795851)                                           | 2290 / 423.91 nt                            |
| RH Run 1<br>(9286022)                                 | P026   | RH      | 1679262                   | 13637 – 0.81%                        | 0.33% (JX424937)                                           | 5483 / 947.73 nt                            |
|                                                       | P097   | RH      | 1707512                   | 19707 – 1.15%                        | 0.25% (JF927763)                                           | 4211 / 613.31 nt                            |
|                                                       | P099   | RH      | 1934615                   | 30732 – 1.57%                        | 0.53% (JF927753)                                           | 5007 / 587.88 nt                            |
|                                                       | P156   | RH      | 1109307                   | 31345 – 2.83%                        | 1.58% (X97895)                                             | 4382 / 536.23 nt                            |
| RH Run 2<br>(9062001)                                 | P141   | RH      | 1290010                   | 29782 – 2.31%                        | 1.43% (AB331517)                                           | 5601 / 640.82 nt                            |
|                                                       | P221   | RH      | 1239910                   | 29734 – 2.40%                        | 0.57% (JF927763)<br>0.76% (JF927754)                       | 6467 / 559.37 nt<br>5724 / 581.00 nt        |
|                                                       | P166   | RH      | 1146691                   | 15110 – 1.32%                        | 0.24% (AY138970)                                           | 2418 / 338.90 nt                            |
|                                                       | P059   | RH      | 1140049                   | 107460 – 9.43%                       | 1.79% (MF418030)                                           | 4784 / 612.05 nt                            |
|                                                       |        |         |                           |                                      | 6.50% (KR605396)<br>0.13% (MH795851)                       | 5681 / 584.20 nt<br>2652 / 493.29 nt        |

<sup>1</sup> MinION reads that passed the Minknow quality filtering

<sup>2</sup> after Porechop trimming and demultiplexing

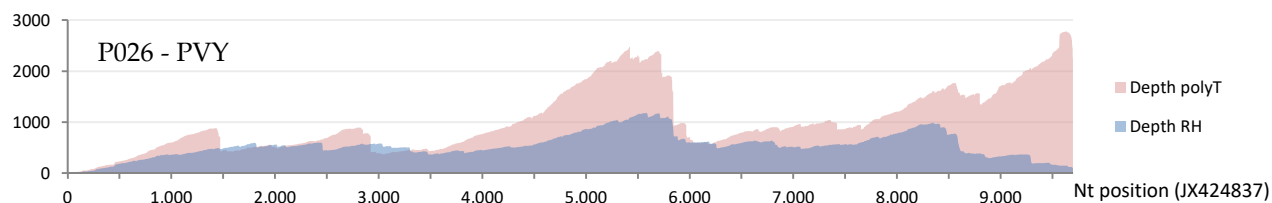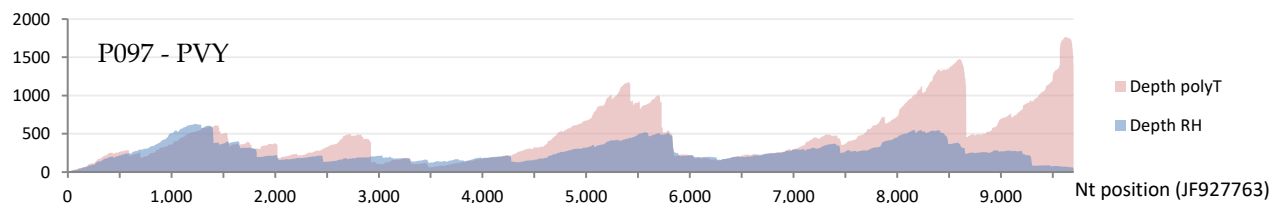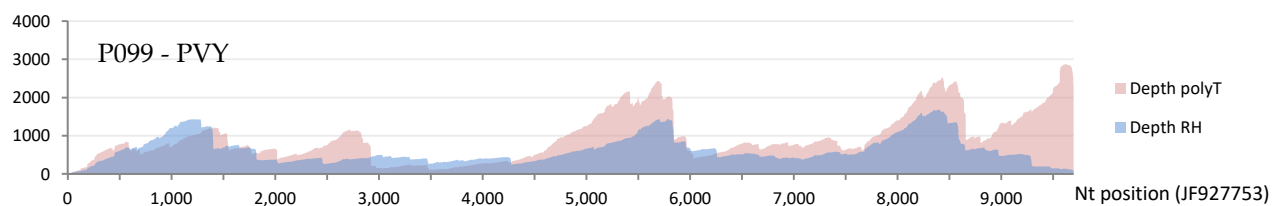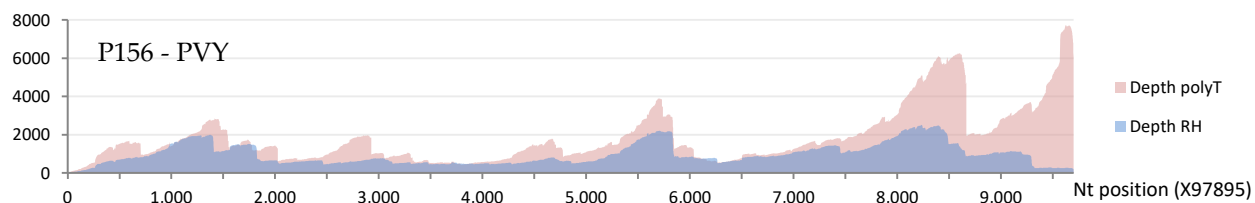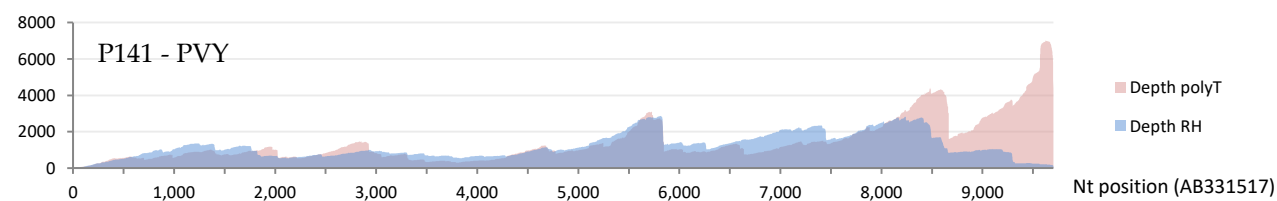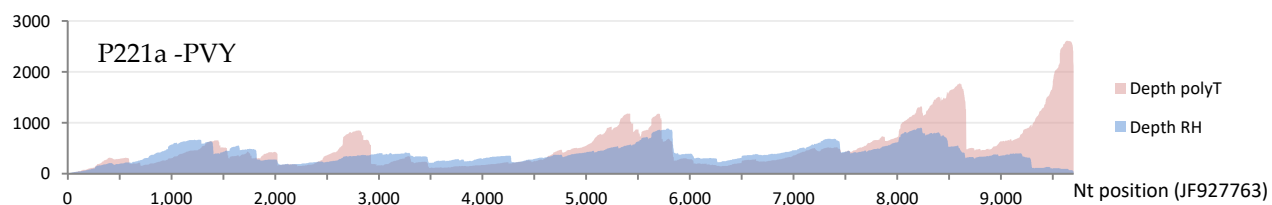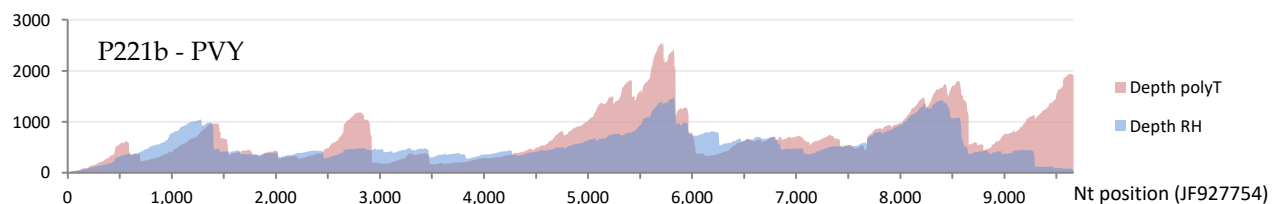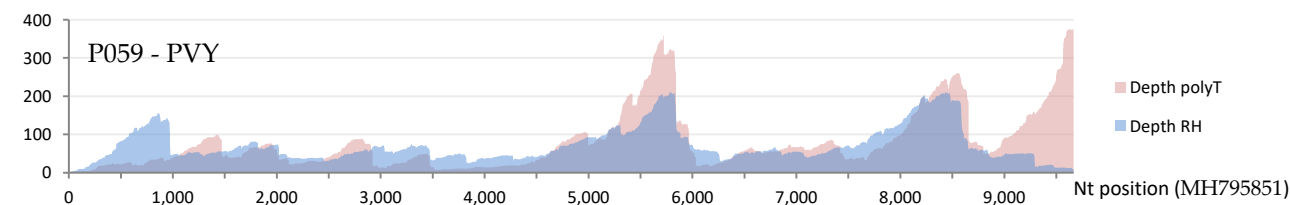

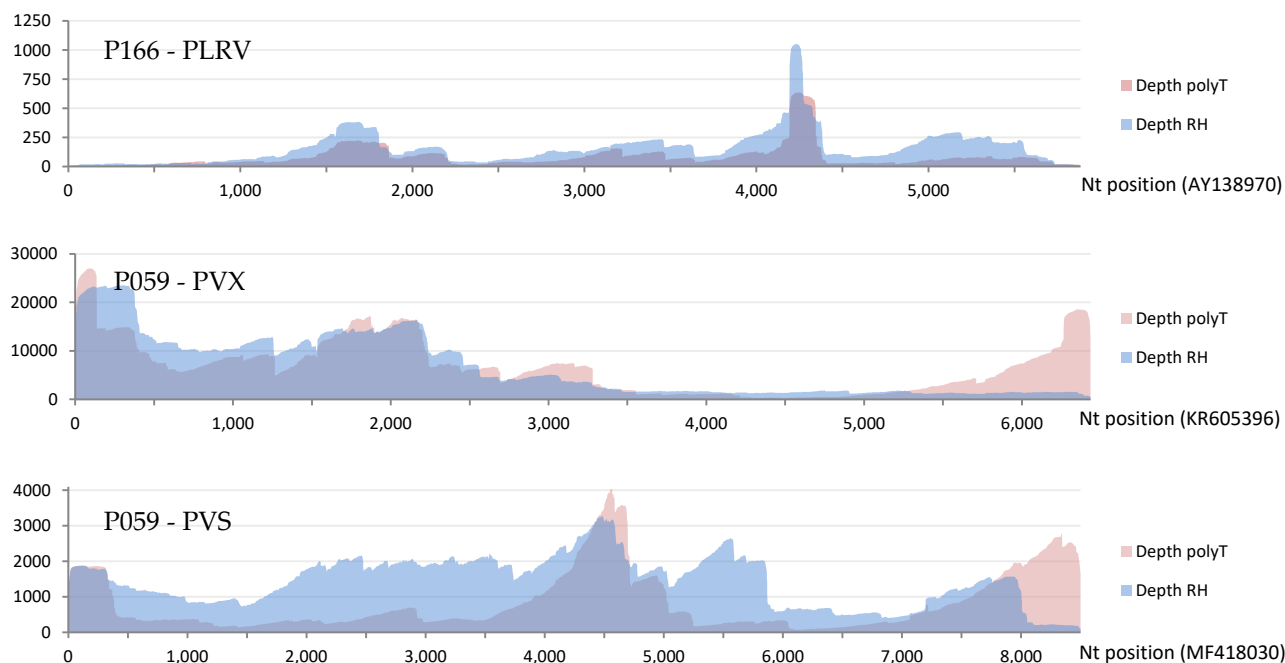

**Figure S.2.** (continued from previous page) Coverage graphs obtained by mapping ONT reads to the viral reference sequence (GenBank accession number in parenthesis on the right side of every graph). Per each sample, sequencing depths (y axis) at every nt position (x axis) from polyT- (pink) and random hexamers-primed (blue) libraries are plotted in a single graph. For clarity of display, the y axis on each graph scaled accordingly.

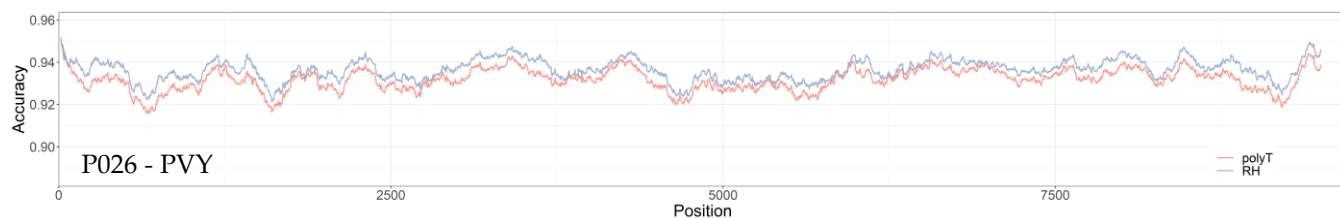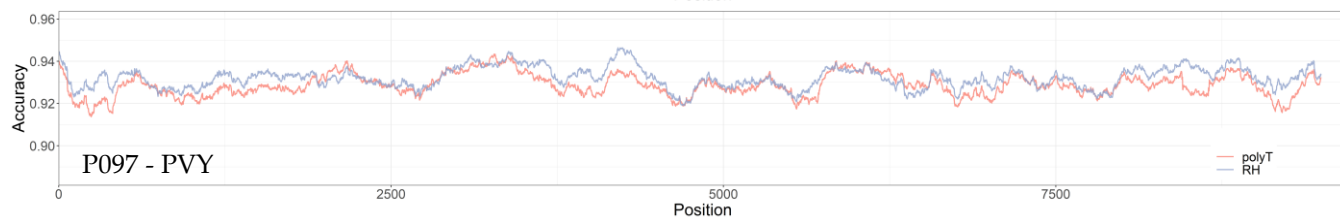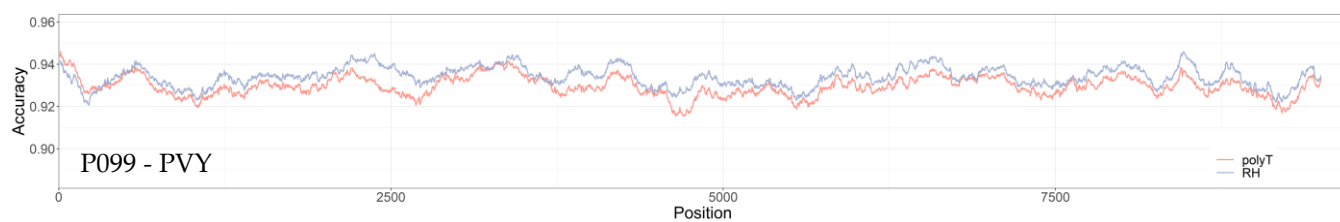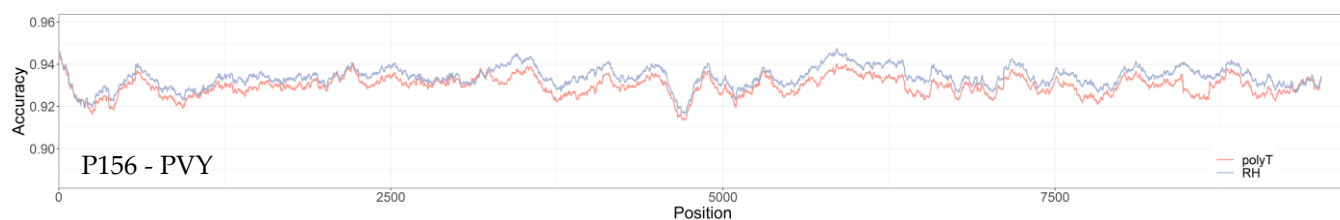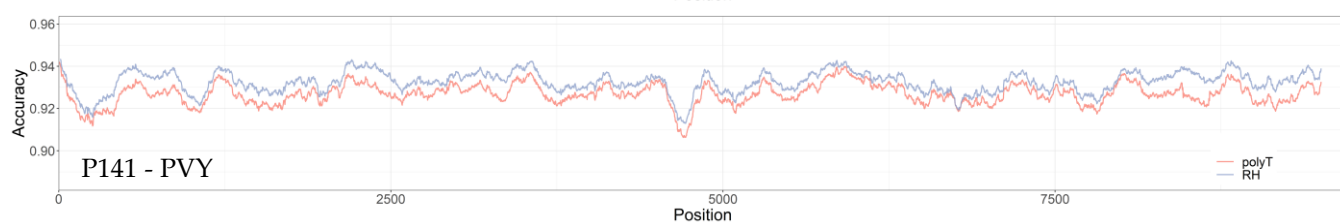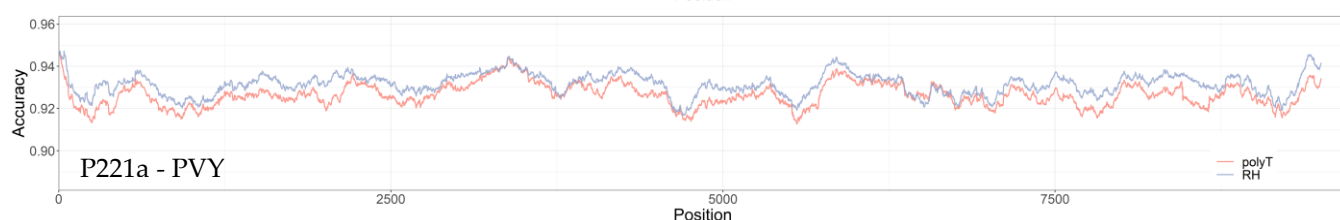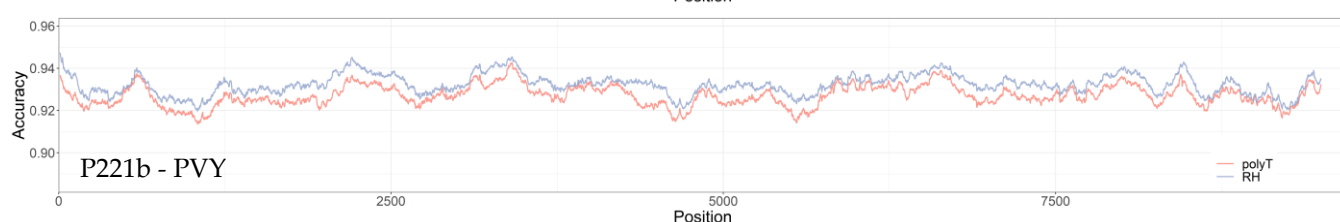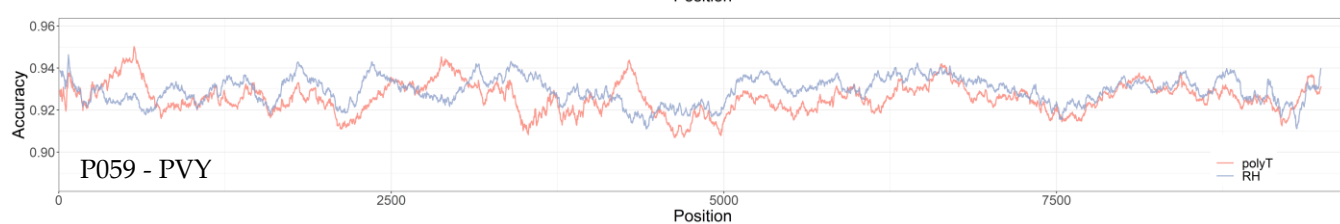

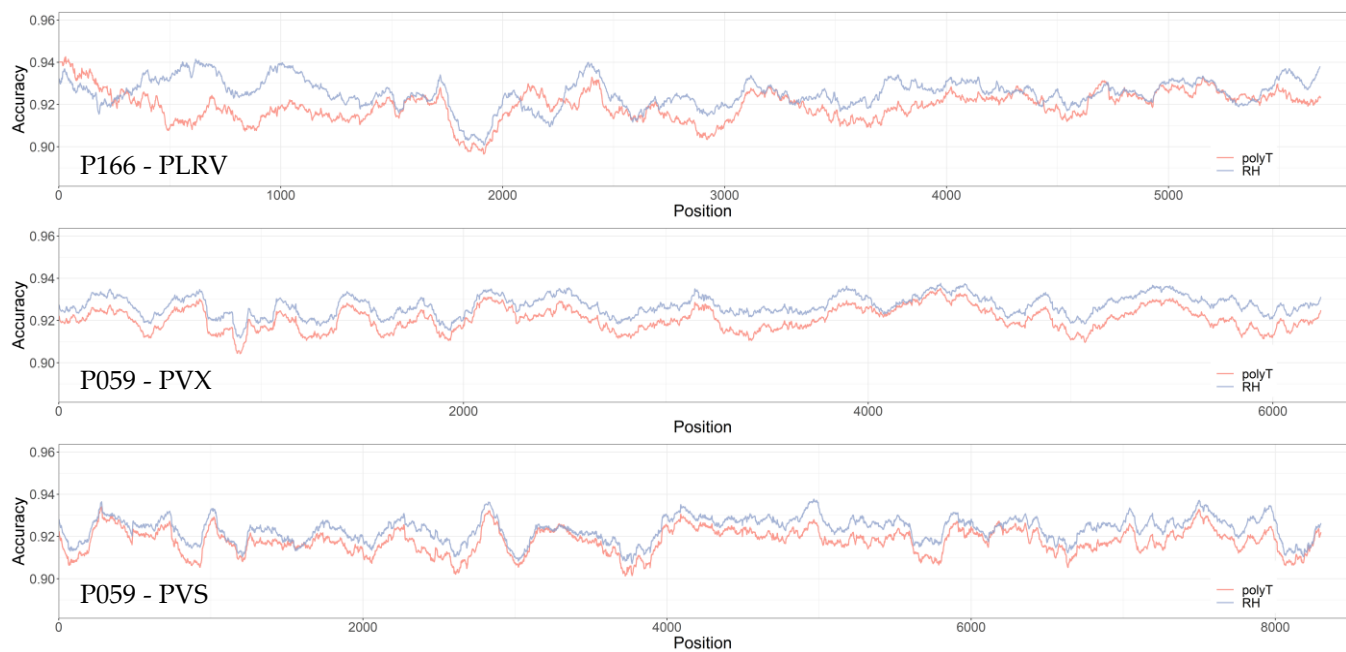

**Figure S.3.** (continued from previous page) Base accuracy of polyT- and random hexamers-primed ONT reads mapping to the Illumina-based final consensus sequences of the viruses detected in this study. Accuracy is expressed as percentage of matches over coverage at each nt position.

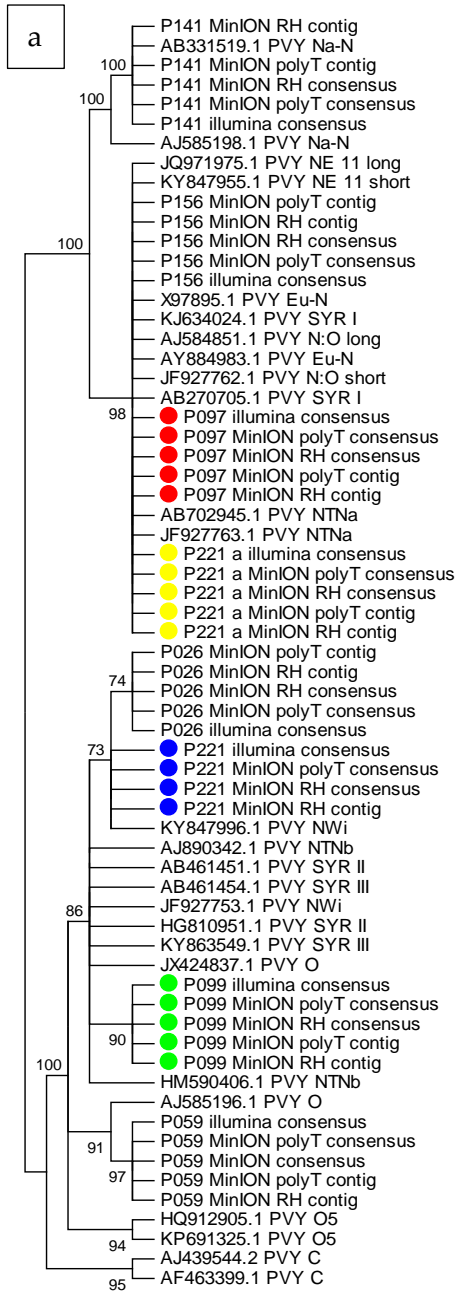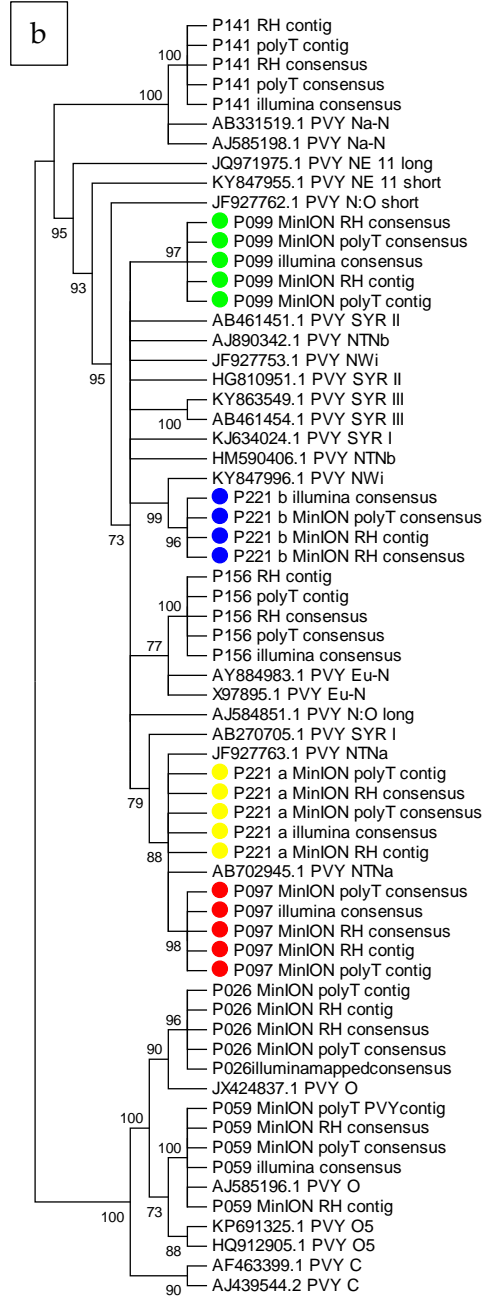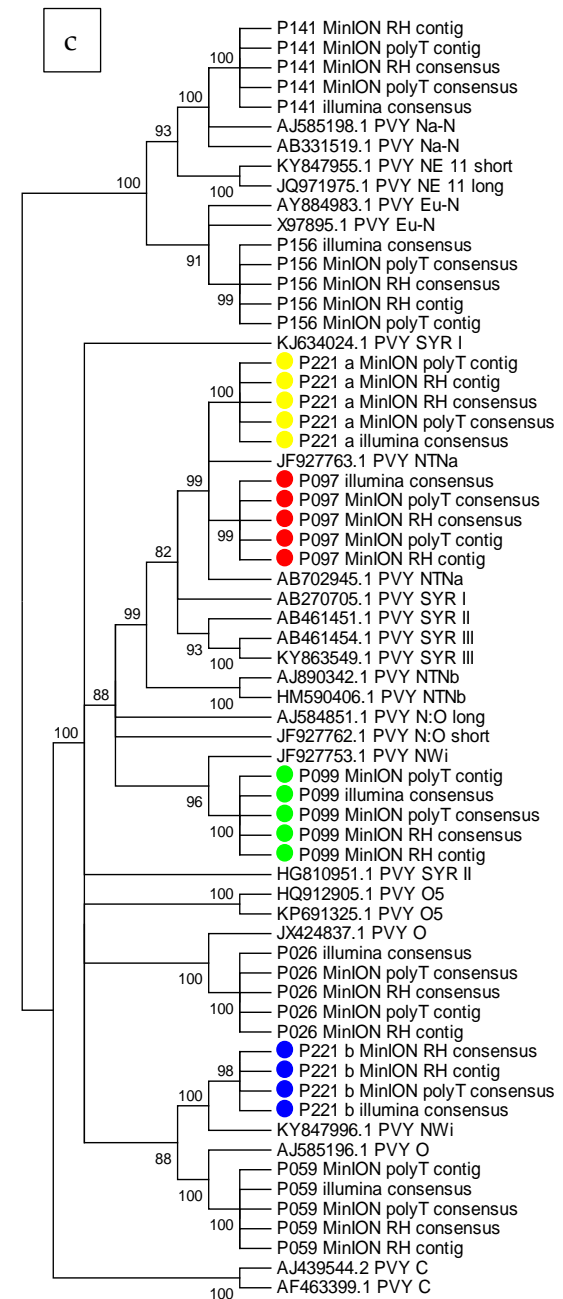

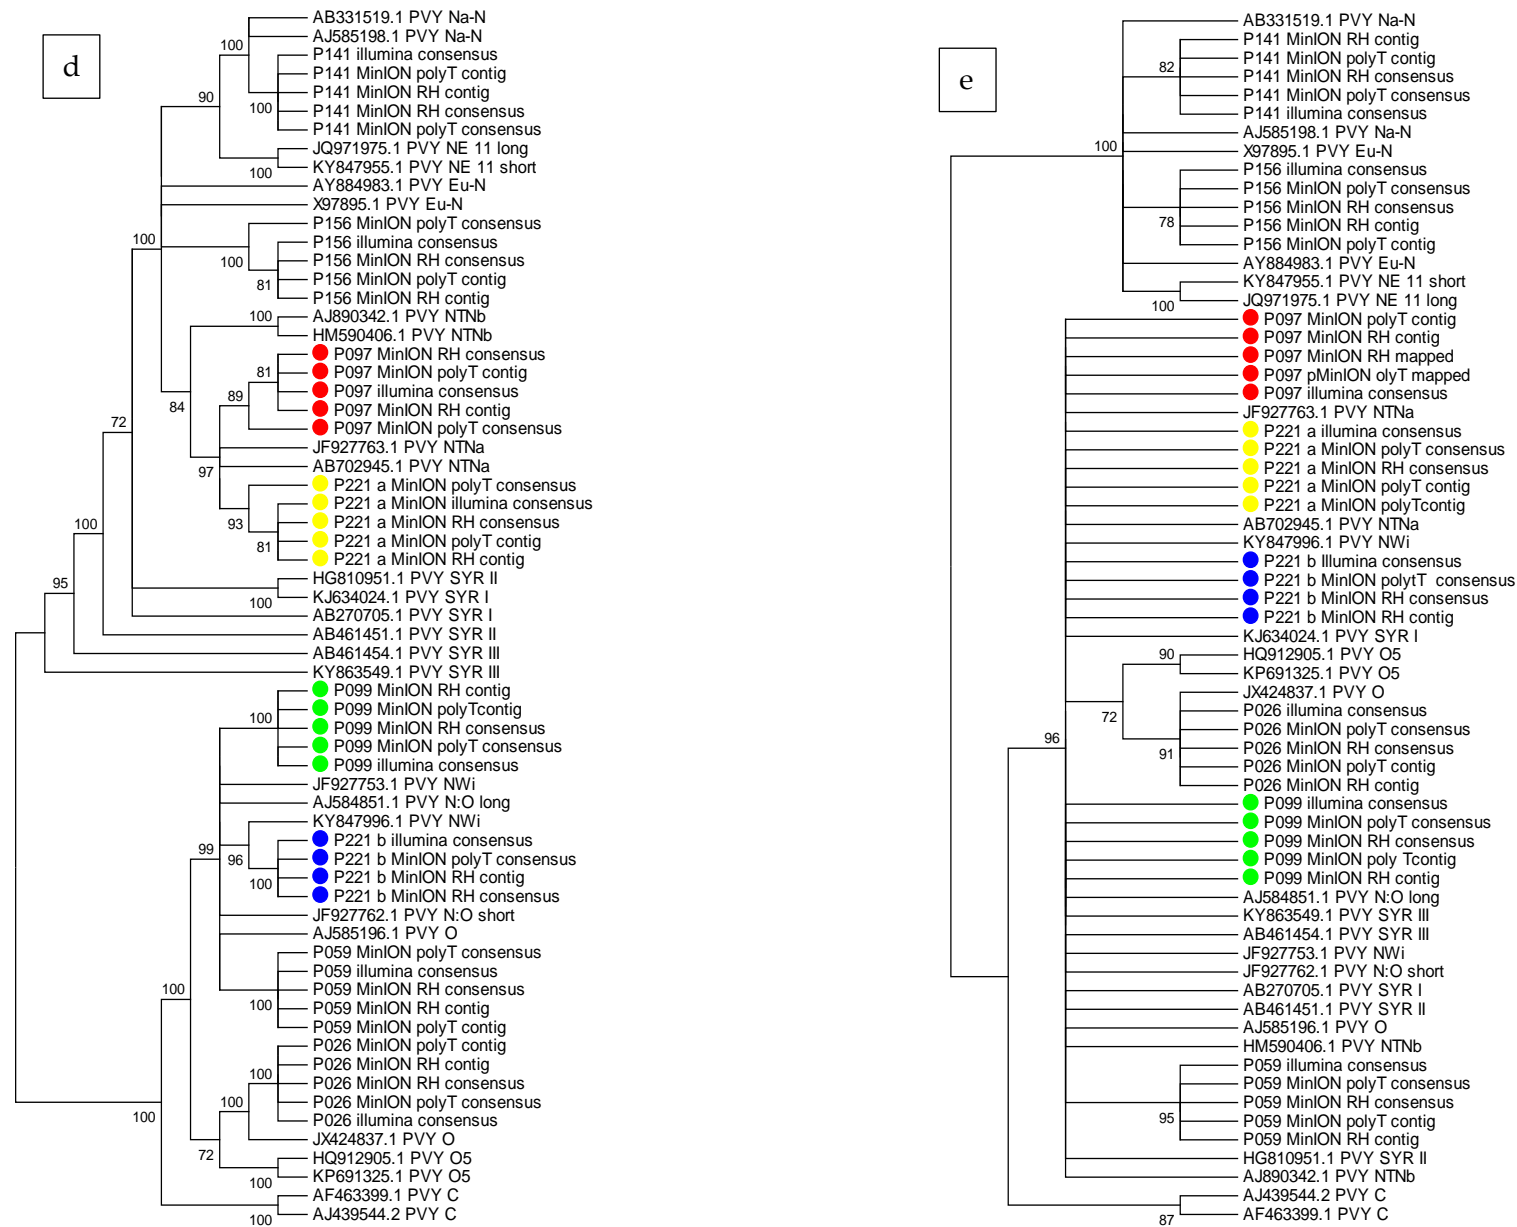

**Figure S.4** (continued from previous page) Condensed maximum likelihood phylogenetic trees for different portions of PVY genomes, as identified by recombination analysis. **(a)** Section 1 from the 5' end to nucleotide position 500; **(b)** Section 2, nucleotide positions 501 – 2390; **(c)** Section 3, nucleotide positions 2391 – 5850; **(d)** Section 4, nucleotide positions 5851 – 9200; **(e)** Section 5, from nucleotide position 9201 the 3' end of PVY genome. Recombinant PVY sequences obtained in this study are marked with colored dots (P097 red; P099 green; P221 a yellow; P221 b blue) Only bootstrap values higher than 70% are shown.
